# Supplementary material
Source: PubMed Central journal article supplement (PMC4001547)
Supplement: JCI72522sd.pdf [file JCI72522sd.pdf]

## Supplementary Figure Legends

**Supplementary Figure 1. EPHA2 expression and activity in NSCLC.** (A) EPHA2 expression was assessed in the lung tissue of a mutant *Kras* model of NSCLC by western blot analysis of paired tumor and normal lung tissue. Two representative mice were used per condition (*Kras*<sup>G12D</sup>*EphA2*<sup>+/+</sup>, A and B, and *Kras*<sup>G12D</sup>*EphA2*<sup>-/-</sup>, C and D). EPHA2 expression levels in mouse tumors were compared with those in human NSCLC lines. (B) Cells were serum starved overnight and stimulated with EPHRIN-A1 (EFNA1, 100ng/mL) for 15 minutes before lysis. EPHA2 was immunoprecipitated, followed by immunoblotting for phospho-tyrosine (pY). (C) Total cell lysates of cells starved and stimulated with 10% FBS were probed for phosphorylated EPHA2 (S897). Relative levels of EPHA2 expression across the various cell lines are shown.  $\beta$ -TUBULIN expression was used as a loading control.

**Supplementary Figure 2. ALW-II-41-27 inhibits cell viability and promotes apoptosis.** (A) H358 cells were treated with 1 $\mu$ M NG-25 or ALW-II-41-27 over a time course and cell viability was determined via the MTT assay. Experiments were repeated three times and data are presented as the percentage of viable cells after NG-25 or ALW-II-41-27 treatment relative to DMSO treatment  $\pm$  SEM. (B) Cells were treated with 1 $\mu$ M of indicated drug for 6 hours, and apoptosis was assessed by quantifying the histone associated DNA fragments via a cell death ELISA Kit (Roche). Data was normalized to respective DMSO controls. \*  $p < 0.05$ , \*\*  $p < 0.01$ .

**Supplementary Figure 3. Histopathologic analysis of vital organs in mice treated with ALW-II-41-27, NG-25, or the vehicle.** H358 cells were engrafted in nude mice and treated with 15mg/kg of ALW-II-41-27, NG-25, or the vehicle twice daily for 14 days, as in Figure 8A. Heart, liver, and kidney were harvested at the end of studies and tissue sections were stained with H&E. Scale bars indicate 100  $\mu$ m.

**Supplementary Figure 4. Comparison of the efficacy of tyrosine kinase inhibitors relative to ALW-II-41-27 in NSCLC cell lines.** Cells were treated for 72 hours with the indicated TKIs before measuring viability by the MTT assay. H2009 and H358 cells contain a mutation in *KRAS*. PC-9 and H1437 cells carry a mutation in *EGFR* and a mutation in *MEK-1*, respectively.

**Supplementary Table 1. Lung cancer cell lines used in the study with their respective driver mutations.**

**Supplementary Table 2. Drug-target interaction in xenograft tumors in situ.** \*H358 xenograft tumors treated with 30mg/kg ALW-II-41-27 for five days (n=5/group) (as in Figure 8I) were analyzed for drug-target interaction by chemical proteomics platform, KiNativ. Tumor lysate was incubated with ATP-biotin labeled probes to assess which kinases received protection from the drug binding. Percent inhibition of kinase labeling by the ATP-biotin probes is shown with the larger numbers representing a stronger interaction between the inhibitor and the kinase. Additionally, A375 cells were tested in a similar manner in vitro by treatment with 5μM and 0.5μM ALW-II-41-27 or NG-25 (control compound). Colors indicate the level of inhibition of ATP binding to the respective kinase: Brown (90% inhibition), Red (90-75% inhibition), Orange (75-50% inhibition), Yellow (50-35% inhibition), and Green (no change). ACT = Activation loop; Lys1 = Conserved Lysine 1; Lys2 = Conserved Lysine 2; Other = Labeling of residue outside of the protein kinase domain; N.D. = Not detected. \*\* The in vitro IC<sub>50</sub> of ALW-II-41-27 and NG-25 was determined by in vitro kinase assay using the SelectScreen™ Kinase Profiling Service (Life Technologies).

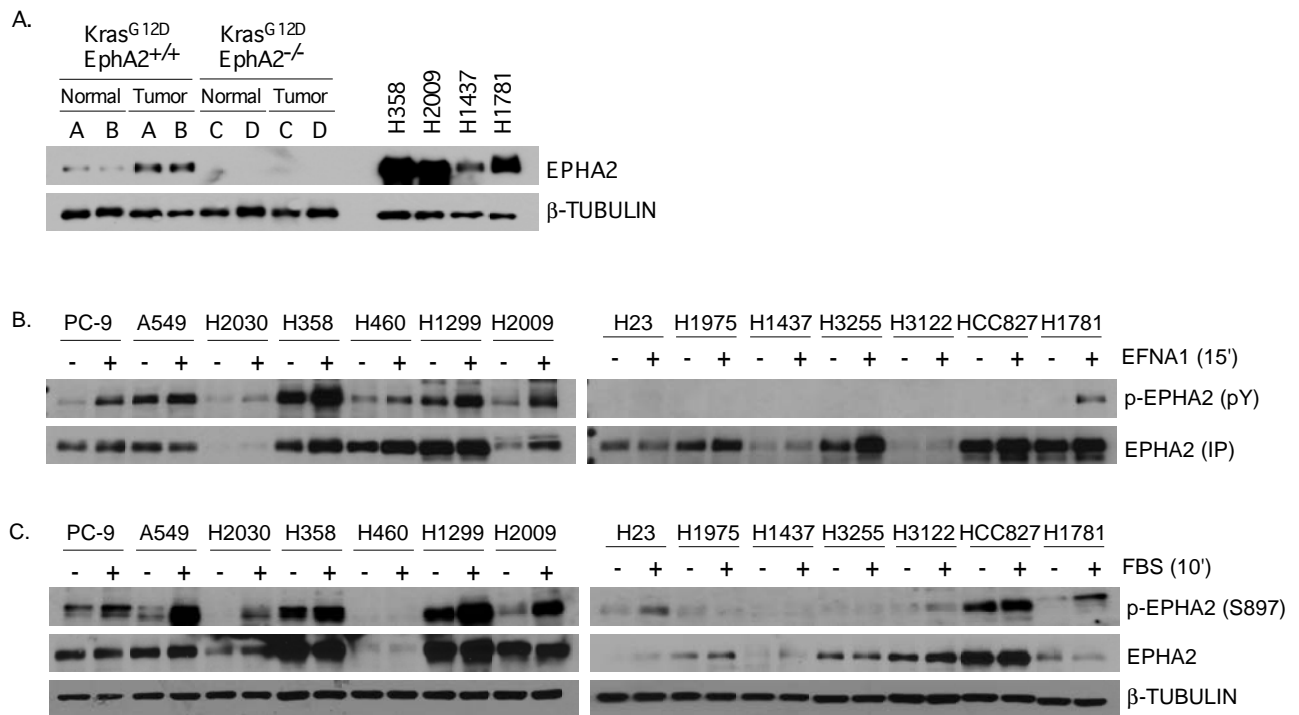

A.

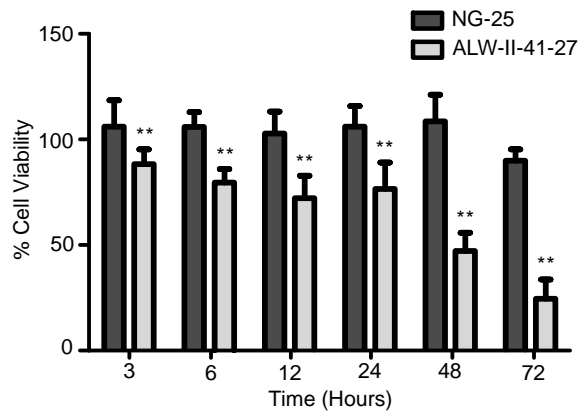

B.

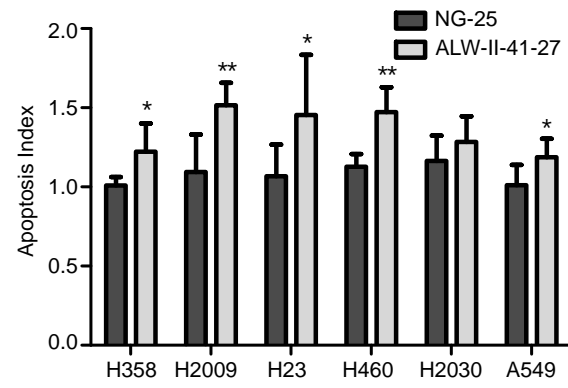

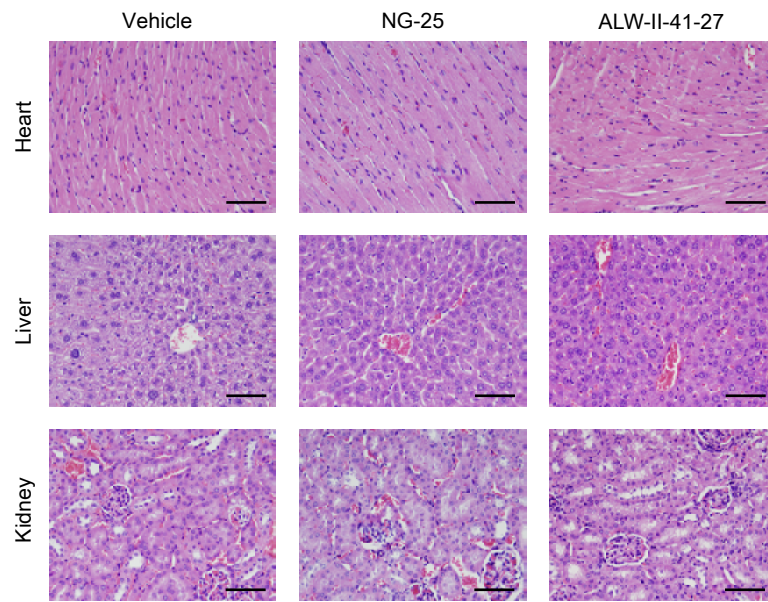

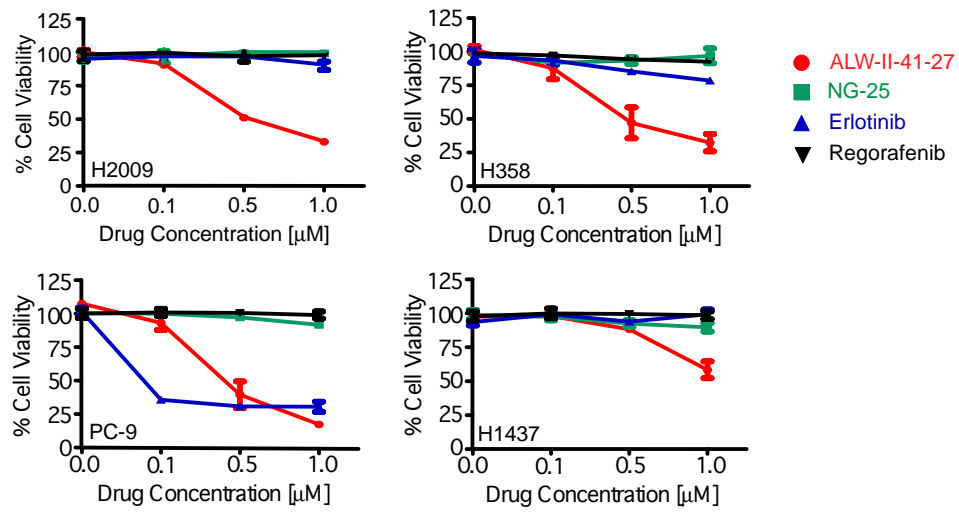

| Cell Line | KRAS | EGFR         | Other Mutations |
|-----------|------|--------------|-----------------|
| A549      | G12S |              |                 |
| H2009     | G12A |              |                 |
| H2030     | G12C |              |                 |
| H23       | G12C |              |                 |
| H358      | G12C |              |                 |
| H460      | Q61H |              |                 |
| H1975     |      | L858R; T790M |                 |
| H3255     |      | L858R        |                 |
| HCC827    |      | $\Delta$ 19  |                 |
| PC-9      |      | $\Delta$ 19  |                 |
| H1299     |      |              | NRAS            |
| H1437     |      |              | MEK1            |
| H1781     |      |              | HER2            |
| H3122     |      |              | EML4-ALK        |

| Kinases       | Sequence                                              | Labeling Site | KiNativ Inhibition Percentage |        |        |        |        | **                              |        |
|---------------|-------------------------------------------------------|---------------|-------------------------------|--------|--------|--------|--------|---------------------------------|--------|
|               |                                                       |               | ALW-II-41-27                  |        | NG-25  |        |        | Enzymatic IC <sub>50</sub> (nM) |        |
|               |                                                       |               | *<br>H358<br>Xenograft        | A375   |        |        |        | ALW-II-41-27                    | NG-25  |
|               |                                                       |               |                               | 5.0 μM | 0.5 μM | 5.0 μM | 0.5 μM |                                 |        |
| ABL,ARG       | LMTGDTYTAHAGAKFPIK                                    | ACT           | >98.2                         | >95    | >95    | > 98   | > 98   | 7.7                             | 75.2   |
| ABL,ARG       | YSLTVAVKTLKEDTMEVEEFLK                                | Lys1          | >95.9                         | >90    | >90    | 86.8   | 85.5   |                                 |        |
| GAK           | DLKVENLLLSNQGTIK                                      | Lys2          | >95.2                         | N.D    | N.D    | N.D    | N.D    |                                 |        |
| LYN           | VAVKTLKPGTMSVQAFL E E E A N L M K                     | Lys1          | >94.8                         | N.D    | N.D    | > 95   | 90.5   | 0.8                             | 12.9   |
| ZAK           | WISQDKEVAVKK                                          | Lys1          | >93.6                         | >98    | >98    | 98.1   | 93.0   | 40.2                            | 698    |
| p38a          | QELNKTIWEVPER                                         | Other         | 98.5                          | 97.7   | 98.1   | 53.3   | 51.9   | 55.6                            | 102    |
| EPHA2         | VLEDDPEATYTTSSGGKIPIR                                 | ACT           | 95.1                          | 98.3   | 97.5   | 57.7   | 27.9   | 11                              | 773    |
| p38b          | QELNKTVWEVPQR                                         | Other         | 91.6                          | 38.7   | 44.2   | -241.6 | -228.7 | 138                             | 194    |
| FRK           | HEIKLPVK                                              | ACT           | 91.6                          | N.D    | N.D    | N.D    | N.D    | 17.3                            | 144    |
| CSK           | VSDFGLTKEASSTQDTGKLPVK                                | ACT           | 87.7                          | 99.4   | 95.0   | 78.2   | 36.5   | 13.9                            | 56.4   |
| FYN, SRC, YES | QGAKFPIKWTAPEAALYGR                                   | ACT           | 87.2                          | 93.4   | 85.4   | 89.6   | 36.5   | 14.4                            | 113    |
| p38a          | DLKPSNLAVNEDCELK                                      | Lys2          | 62.9                          | 65.3   | 71.7   | 21.9   | 20.2   | 55.6                            | 102    |
| EPHB4         | FLEENSSDPTYTSSLGGKIPIR                                | ACT           | 61.4                          | N.D    | N.D    | -4.2   | 39.2   | 13.1                            | 999    |
| HER3/ErbB3    | GVWIPEGESIKIPVCIKVIEDK                                | Lys1          | 56.7                          | -43.1  | -14.3  | 27.3   | 22.8   |                                 |        |
| EPHB2         | FLEDDTSDPTYTSALGGKIPIR                                | ACT           | 52.2                          | >85    | 12.2   | 21.6   | -2.2   | 14.4                            | 672    |
| EPHB3         | FLEDDPSDPTYTSSLGGKIPIR                                | ACT           | 45.1                          | N.D    | N.D    | N.D    | N.D    | 119                             | 3710   |
| BRAF          | DLKSNNIFLHEDLTVK                                      | Lys2          | 44.0                          | >80    | >80    | 66.8   | 22.5   | 1280                            | >10000 |
| BTK           | YVLDDEYTSSVGSKFPVR                                    | ACT           | 40.3                          | N.D    | N.D    | N.D    | N.D    |                                 |        |
| JAK1 domain2  | IGDFGLTKAIETDKEYYTVK                                  | ACT           | 37.9                          | 83.7   | 48.7   | 95.4   | 20.8   |                                 |        |
| PRP4          | CNHLHADIKPDNILVNESK                                   | Lys2          | 37.8                          | -15.4  | -4.3   | -33.5  | -34    |                                 |        |
| YSK1          | EVVAIKIDLEEADEIEDIQEITVLSQCDSPIYTR                    | Lys1          | 37.5                          | N.D    | N.D    | N.D    | N.D    |                                 |        |
| EPHA1         | LLDDFDGTYETQGGKIPIR                                   | ACT           | 31.4                          | N.D    | N.D    | N.D    | N.D    |                                 |        |
| EPHA7         | VIEDDPEAVYTTTGGKIPVR                                  | ACT           | 28.3                          | N.D    | N.D    | N.D    | N.D    |                                 |        |
| EGFR          | LLGAEEKEYHAEGGKVPK                                    | ACT           | 24                            | 84.7   | 31.3   | 0.7    | 4.8    |                                 |        |
| PI3KCA        | RPLWLNWENPDIMSELLFQNNIEIFKNGDDL R Q D M L T L Q I I R | ATP           | -0.8                          | N.D    | N.D    | 28.3   | 21.9   |                                 |        |
| ERK1          | DLKPSNLLINTTCDLK                                      | Lys2          | -11.5                         | 0.3    | 7.4    | -49.9  | -31.9  |                                 |        |
| HER2/ERBB2    | GIWIPDGENVKIPVAIKVLR                                  | Lus1          | -22.5                         | 97.1   | 70.9   | -19.4  | -60.4  |                                 |        |
